# Supplementary material for: Healthcare Resource Utilization and Direct Cost of Patients with Atopic Dermatitis in Dubai, United Arab Emirates: A Retrospective Cohort Study
Source: Springer Nature journal article supplement (doi:10.1007/s13555-022-00769-z), 2022-07-19
Supplement: MOESM1 [file 23283168]

## SUPPLEMENTARY MATERIAL

### HEALTHCARE RESOURCE UTILIZATION AND DIRECT COST OF ATOPIC DERMATITIS PATIENTS IN DUBAI, UNITED ARAB EMIRATES: A RETROSPECTIVE COHORT STUDY

**Authors:** Anwar Al Hammadi<sup>1</sup>, Jaheersha Pakran<sup>2</sup>, Mohamed Farghaly<sup>3</sup>, Haytham Mohamed Ahmed<sup>4</sup>; Amy Cha<sup>5</sup>, Dilara Balkan<sup>6</sup>, Sherif Afifi<sup>7</sup>, Badarinath Chickballapur Ramachandrarachar<sup>8</sup>, Ashok Natarajan<sup>9</sup>, Sreenivasulu Linga<sup>10</sup>, Khadija Al Jefri<sup>11</sup>

**Affiliations:** <sup>1</sup>Consultant Dermatologist, Dermamed Clinic, Dubai, UAE; <sup>2</sup> M.D. Dermatology, Rashid Hospital, Dubai Health Authority; <sup>3</sup>Health Economics & Insurance Policies Department, Dubai Health Authority, Dubai, UAE; <sup>4</sup>Pfizer Inc. Ltd, Dubai, UAE; <sup>5</sup>Pfizer Inc. Ltd, New York, USA <sup>6</sup>Pfizer Inc. Ltd, Dubai, UAE; <sup>7</sup>Pfizer, Inc. Ltd, Dubai, UAE; <sup>8</sup>IQVIA, Dubai, UAE; <sup>9</sup>IQVIA, Dubai, UAE; <sup>10</sup>IQVIA, Dubai, UAE; <sup>11</sup>Consultant Dermatologist, Dermamed Clinic, Dubai, UAE

**Corresponding author:**

Dr. Anwar Al Hammadi

Consultant Dermatologist, Dermamed Clinic, Dubai, UAE

E-mail: [alhammadi@dermamed.ae](mailto:alhammadi@dermamed.ae)

Phone Number: +971554532223

## SUPPLEMENTARY TABLES

**Table S1: Evaluability Criteria for Inclusion and Exclusion of Patients in the Mild-to-Moderate AD Cohort**

| Feasibility Assessment Criteria                                                                                                                                                                                                                  | Included |        | Excluded |       |
|--------------------------------------------------------------------------------------------------------------------------------------------------------------------------------------------------------------------------------------------------|----------|--------|----------|-------|
|                                                                                                                                                                                                                                                  | N        | %      | N        | %     |
| <b>Broader Inclusion Criteria</b>                                                                                                                                                                                                                |          |        |          |       |
| Patient with AD diagnosis (L20.x) anytime during the study period <sup>a</sup>                                                                                                                                                                   | 850,867  | NA     | NA       | NA    |
| Patient with at least 2 AD diagnoses (L20.x) ICD-10-CM codes anytime during the study time period <sup>a</sup>                                                                                                                                   | 442,956  | 52.1%  | 407,911  | 47.9% |
| <b>Criteria for inclusion of patients in the mild-to-moderate AD cohort</b>                                                                                                                                                                      |          |        |          |       |
| Patients using pimecrolimus cream or tacrolimus ointment or Topical Corticosteroids (TCS) or Crisaborole <sup>b</sup> (Topical PDE4 inhibitor) in study time period <sup>a</sup>                                                                 | 335,751  | 75.8%  | 107,205  | 24.2% |
| Patients with first AD treatment of pimecrolimus cream or tacrolimus ointment or TCS in index period <sup>c</sup>                                                                                                                                | 228,617  | 68.1%  | 107,134  | 31.9% |
| Patients with at least one AD diagnosis in the 12 months pre-index period                                                                                                                                                                        | 44,464   | 19.4%  | 184,153  | 80.6% |
| Patients with age $\geq 3$ months <sup>d</sup> (latest available age at the time of data abstraction).<br>Note: Patient with all the age groups have been included <sup>e</sup> (due to limitation of the age specific variable in the database) | 44,464   | 100.0% | -        | 0.0%  |
| Continuously enrolled during study time period <sup>e</sup>                                                                                                                                                                                      | 10,188   | 22.9%  | 34,276   | 77.1% |
| Patients with at least one claim for a mild-to-moderate AD treatment pimecrolimus cream or tacrolimus ointment or TCS in the index period <sup>c</sup>                                                                                           | 10,188   | 100.0% | -        | 0.0%  |
| Patient with no mild-to-moderate AD treatment in the 12 months pre-index diagnosis period                                                                                                                                                        | 10,188   | 100.0% | -        | 0.0%  |
| <b>Exclusion Criteria</b>                                                                                                                                                                                                                        |          |        |          |       |
| Patients who received any treatment related to moderate-to-severe AD at any time during their period of continuous eligibility <sup>c</sup>                                                                                                      |          |        |          |       |
| - Systemic immunosuppressants                                                                                                                                                                                                                    | 10,173   | 99.9%  | 15       | 0.1%  |

| Feasibility Assessment Criteria                                   | Included |        | Excluded |      |
|-------------------------------------------------------------------|----------|--------|----------|------|
|                                                                   | N        | %      | N        | %    |
| (Cyclosporine, Methotrexate, Azathioprine, Mycophenolate mofetil) |          |        |          |      |
| - Systemic biologics (IL-4 receptor alpha antagonist): Dupilumab  | 10,169   | 100.0% | 4        | 0.0% |
| - Phototherapy                                                    | 10,134   | 99.6%  | 39       | 0.4% |

Abbreviations: AD: Atopic Dermatitis; ICD-10-CM: International Classification of Diseases, Tenth Revision, Clinical Modification; IL: interleukin; NA: Not Applicable; PDE: Phosphodiesterase; TCS: Topical Corticosteroids

<sup>a</sup> Study period was 01 January 2014 to 31 March 2020

<sup>b</sup> The Topical PDE4 inhibitor - crisaborole is not available in Dubai

<sup>c</sup> Index period was 01 January 2015 to 31 March 2019

<sup>d</sup> Patient with all the age groups have been included (due to limitation of the age specific variable in the database)

<sup>e</sup> Criteria for continuous enrollment: At least 1 activity claim for any service (medication, procedures, consultation services, and consumables) anytime during the 2 pre- & post 6-month periods in the study time period

**Table S2: Evaluability Criteria for Inclusion and Exclusion of Patients in the Moderate-to-Severe AD Cohort**

| Feasibility Assessment Criteria                                                                                                                                                                                                                                                                                                                                                       | Included |        | Excluded |       |
|---------------------------------------------------------------------------------------------------------------------------------------------------------------------------------------------------------------------------------------------------------------------------------------------------------------------------------------------------------------------------------------|----------|--------|----------|-------|
|                                                                                                                                                                                                                                                                                                                                                                                       | N        | %      | N        | %     |
| <b>Broader Inclusion Criteria</b>                                                                                                                                                                                                                                                                                                                                                     |          |        |          |       |
| Patient with AD diagnosis (L20.x) anytime during the study period <sup>a</sup>                                                                                                                                                                                                                                                                                                        | 850,867  | NA     | NA       | NA    |
| Patient with at least 2 AD diagnoses (L20.x) ICD-10-CM codes anytime during the study time period <sup>a</sup>                                                                                                                                                                                                                                                                        | 442,956  | 52.1%  | 407,911  | 47.9% |
| <b>Criteria for inclusion of patients in the moderate-to-severe AD cohort</b>                                                                                                                                                                                                                                                                                                         |          |        |          |       |
| Patients who received treatment during study time period <sup>d</sup> with the following agents systemic biologics (IL-4 receptor alpha antagonist): dupilumab, corticosteroids (as a class), and systemic immunosuppressants: cyclosporine, methotrexate, azathioprine, mycophenolate mofetil, antihistamines (tablets, syrups, solutions, drops, injections, etc.) and phototherapy | 339,532  | 76.7%  | 103,424  | 23.3% |
| Patients with first AD treatment in index period <sup>b</sup> with the above-mentioned agents                                                                                                                                                                                                                                                                                         | 231,643  | 68.2%  | 107,889  | 31.8% |
| Patients with at least one AD diagnosis in 12 months pre-index diagnosis period                                                                                                                                                                                                                                                                                                       | 43,644   | 18.8%  | 187,999  | 81.2% |
| Patients with age $\geq 3$ months <sup>c</sup> (latest available age at the time of data abstraction). Note: Patient with all the age groups have been included <sup>d</sup> (due to limitation of the age specific variable in the database)                                                                                                                                         | 43,644   | 100.0% | 0        | 0.0%  |
| Continuously enrolled during study period <sup>d</sup>                                                                                                                                                                                                                                                                                                                                | 10,059   | 23.0%  | 33,585   | 77.0% |

| Feasibility Assessment Criteria                                                                        | Included |        | Excluded |       |
|--------------------------------------------------------------------------------------------------------|----------|--------|----------|-------|
|                                                                                                        | N        | %      | N        | %     |
| Patients with at least 2 claims for a moderate-to-severe AD treatment in the index period <sup>b</sup> | 3,515    | 34.9%  | 6,544    | 65.1% |
| Patient with no moderate-to-severe AD treatment in the 12 months pre-index diagnosis period            | 3,515    | 100.0% | -        | 0.0%  |

Abbreviations: AD: atopic dermatitis; ICD-10-CM: International Classification of Diseases, Tenth Revision, Clinical Modification; IL: interleukin; NA: Not Applicable

<sup>a</sup> Study period was 01 January 2014 to 31 March 2020

<sup>b</sup> Index period was 01 January 2015 to 31 March 2019

<sup>c</sup> Patient with all the age groups have been included (due to limitation of the age specific variable in the database)

<sup>d</sup> Criteria for continuous enrollment: At least 1 activity claim for any service (medication, procedures, consultation services, consumables, etc.) anytime during the 2 pre & post 6-month periods in the study time period

Note: As corticosteroids were not considered as an exclusion criterion for the mild-to-moderate (exclusion criteria), there may be a chance of capturing duplicate patients in both cohorts.

**Table S3: Evaluability Criteria for Inclusion and Exclusion of Patients in the Untreated or on Drugs not Included in the Treated AD Cohort**

| Feasibility Assessment Criteria                                                                                | Included |       | Excluded |       |
|----------------------------------------------------------------------------------------------------------------|----------|-------|----------|-------|
|                                                                                                                | N        | %     | N        | %     |
| <b>Broader Inclusion Criteria</b>                                                                              |          |       |          |       |
| Patient with AD diagnosis (L20.x) anytime during the study period <sup>a</sup>                                 | 850,867  | NA    | NA       | NA    |
| Patient with at least 2 AD diagnoses (L20.x) ICD-10-CM codes anytime during the study time period <sup>a</sup> | 442,956  | 52.1% | 407,911  | 47.9% |
| <b>Criteria for inclusion of patients in the Untreated or on drugs not included in the treated AD cohort</b>   |          |       |          |       |
| Patients with AD diagnoses (L20.x) at any time during study time period <sup>a</sup>                           | 850,867  | 100%  | -        | -     |
| Patients with at least 2 AD diagnoses (L20.x) at any time during study time period <sup>a</sup>                | 442,956  | 52.1% | 407,911  | 48.0% |
| Patients with first AD diagnosis in index period <sup>b</sup><br>(Index date = first diagnosed date)           | 306,019  | 69.1% | 136,937  | 30.9% |
| Patients with no AD treatment during the index period <sup>b</sup>                                             | 68,223   | 22.3% | 237,796  | 77.7% |
| Continuously enrolled during study time period <sup>c</sup>                                                    | 10,806   | 15.8% | 57,417   | 84.2% |

Abbreviations: AD: atopic dermatitis; ICD-10-CM: International Classification of Diseases, Tenth Revision, Clinical Modification; NA: Not Applicable

<sup>a</sup> Study period was 01 January 2014 to 31 March 2020

<sup>b</sup> Index period was 01 January 2015 to 31 March 2019. For patients in the untreated or on drugs not included in the treated AD cohort, the first diagnosis date was taken as the index date

<sup>c</sup> Criteria for continuous enrollment: At least one activity claim for any service (medication, procedures, consultation services, consumables, etc.) anytime during the 2 pre & post 6-month periods in the study period

**Table S4: ICD-10-CM Diagnoses Codes for Inclusion of Patients in the Study**

| Diagnosis code | Description                        |
|----------------|------------------------------------|
| L20            | Atopic dermatitis                  |
| L20.0          | Besnier's prurigo                  |
| L20.8          | Other atopic dermatitis            |
| L20.81         | Atopic neurodermatitis             |
| L20.82         | Flexural eczema                    |
| L20.83         | Infantile (acute) (chronic) eczema |
| L20.84         | Intrinsic (allergic) eczema        |
| L20.89         | Other atopic dermatitis            |
| L20.9          | Atopic dermatitis, unspecified     |

**Table S5: Number and Percentage of Consultation-Based Incidence Cases (Patient Age)**

| Age (Years) | 2014          | 2015          | 2016          | 2017          | 2018           | 2019           | 2020 (till March) |
|-------------|---------------|---------------|---------------|---------------|----------------|----------------|-------------------|
| 0-1         | -             | -             | 1 (11.1%)     | 4 (100.0%)    | 2 (40.0%)      | 349 (46.2%)    | 89 (12.1%)        |
| 2-5         | 7 (3.0%)      | 949 (36.1%)   | 3,129 (21.9%) | 6,111 (15.4%) | 5,556 (11.4%)  | 3,417 (7.9%)   | 439 (2.5%)        |
| 6-11        | 2,446 (10.0%) | 3,706 (8.5%)  | 5,715 (8.0%)  | 7,294 (6.7%)  | 5,882 (5.7%)   | 4,169 (5.2%)   | 612 (2.0%)        |
| 12-17       | 953 (5.6%)    | 1,565 (6.1%)  | 2,718 (6.8%)  | 3,513 (6.0%)  | 2,668 (4.8%)   | 1,878 (4.3%)   | 285 (1.8%)        |
| 18+         | 6,947 (2.8%)  | 18,014 (4.1%) | 40,758 (4.7%) | 59,328 (4.2%) | 47,688 (3.5%)  | 34,580 (3.3%)  | 5,257 (1.3%)      |
| Unspecified | 47,096 (3.6%) | 71,244 (4.3%) | 87,464 (4.4%) | 91,712 (3.9%) | 106,574 (3.7%) | 133,177 (3.8%) | 37,571 (2.0%)     |

**Table S6: Number and Percentage of Consultation-Based Prevalence Cases (Patient Age)**

| Age (Years) | 2015          | 2016          | 2017          | 2018          | 2019          | 2020 (till March) |
|-------------|---------------|---------------|---------------|---------------|---------------|-------------------|
| 0-1         | -             | 1 (11.1%)     | 4 (100.0%)    | 4 (80.0%)     | 351 (46.4%)   | 144 (19.5%)       |
| 2-5         | 951 (36.1%)   | 3,492 (24.4%) | 7,192 (18.1%) | 7,450 (15.2%) | 5,206 (12.0%) | 910 (5.2%)        |
| 6-11        | 4,444 (10.2%) | 7,280 (10.2%) | 9,501 (8.7%)  | 8,353 (8.2%)  | 6,442 (7.9%)  | 1,279 (4.2%)      |

|             |                  |                  |                   |                   |                   |                  |
|-------------|------------------|------------------|-------------------|-------------------|-------------------|------------------|
| 12-17       | 1,835<br>(7.1%)  | 3,299 (8.3%)     | 4,446<br>(7.5%)   | 3,783 (6.8%)      | 2,835<br>(6.4%)   | 527 (3.3%)       |
| 18+         | 19,501<br>(4.3%) | 45,754<br>(5.2%) | 68,366<br>(4.8%)  | 58,479<br>(4.3%)  | 44,150<br>(4.1%)  | 8,401<br>(2.1%)  |
| Unspecified | 76,671<br>(4.6%) | 96,768<br>(4.9%) | 102,300<br>(4.3%) | 12,0628<br>(4.2%) | 148,090<br>(4.2%) | 46,356<br>(2.4%) |

**Table S7 Antihistamines Prescribed in Treated AD Cohort (Mild-to-Moderate and Moderate-to-Severe)**

| <b>Drug Class</b>                                                                                       | <b>AD - Mild-to-Moderate<br/>(N = 10,134)</b> | <b>AD - Moderate-to-Severe<br/>(N = 3,515)</b> |
|---------------------------------------------------------------------------------------------------------|-----------------------------------------------|------------------------------------------------|
| Patients with Antihistamines (Tablets, Syrups, solutions, drops, Injections, etc.) in study time period | 6,282 (62.0%)                                 | 2,633 (74.9%)                                  |

Abbreviations: AD: atopic dermatitis

**Table S8: Healthcare Resource Utilization (AD-related) Per patient by Specialty (Top 3) and Costs**

| <b>AD-related HCRU and associated cost (in USD) per member by specialty</b> | <b>Treated AD cohort – Mild-to-Moderate</b> | <b>Treated AD cohort - Moderate-to-Severe</b> | <b>Untreated or on Drugs not included in the treated AD cohort</b> |
|-----------------------------------------------------------------------------|---------------------------------------------|-----------------------------------------------|--------------------------------------------------------------------|
| <b>Mean (SD) disease-specific HCRU inpatient visits</b>                     |                                             |                                               |                                                                    |
| Dermatology                                                                 | 4.4 (5.2)                                   | 4.4 (5.2)                                     | 1.3 (0.6)                                                          |
| Pediatrics                                                                  | 3.4 (4.5)                                   | 4.0 (4.9)                                     | 1.4 (0.5)                                                          |
| General Practice/Family Medicine                                            | 4.6 (5.6)                                   | 5.2 (5.8)                                     | 1.4 (0.6)                                                          |
| <b>Mean (SD) disease-specific HCRU outpatient visits</b>                    |                                             |                                               |                                                                    |
| Dermatology                                                                 | 5.0 (5.1)                                   | 6.7 (6.1)                                     | 1.8 (1.7)                                                          |
| Pediatrics                                                                  | 4.7 (4.8)                                   | 6.4 (5.5)                                     | 1.7 (1.3)                                                          |
| General Practice/Family Medicine                                            | 4.8 (4.9)                                   | 6.4 (5.8)                                     | 1.8 (1.5)                                                          |
| <b>Mean (SD) disease-specific HCRU emergency visits</b>                     |                                             |                                               |                                                                    |
| Dermatology                                                                 | 3.3 (1.8)                                   | 3.8 (1.7)                                     | 2.0 (1.8)                                                          |

| <b>AD-related HCRU and associated cost (in USD) per member by specialty</b>                    | <b>Treated AD cohort – Mild-to-Moderate</b> | <b>Treated AD cohort - Moderate-to-Severe</b> | <b>Untreated or on Drugs not included in the treated AD cohort</b> |
|------------------------------------------------------------------------------------------------|---------------------------------------------|-----------------------------------------------|--------------------------------------------------------------------|
| Pediatrics                                                                                     | 3.2 (1.6)                                   | 3.5 (1.5)                                     | 1.9 (1.5)                                                          |
| General Practice/Family Medicine                                                               | 3.1 (1.7)                                   | 3.7 (1.6)                                     | 1.8 (1.3)                                                          |
| <b>Mean (SD) healthcare resource costs (USD) for dermatology, overall</b>                      |                                             |                                               |                                                                    |
| Gross Cost                                                                                     | 371.3 (1626.8)                              | 518.3 (2061.4)                                | 147.8 (278.4)                                                      |
| Patient share                                                                                  | 36.9 (62.7)                                 | 46.7 (73.1)                                   | 17.0 (29.7)                                                        |
| Net cost <sup>a</sup>                                                                          | 334.9 (1514.7)                              | 471.4 (1929.9)                                | 133.5 (264.3)                                                      |
| <b>Mean (SD) healthcare resource costs (USD) for pediatrics, overall</b>                       |                                             |                                               |                                                                    |
| Gross Cost                                                                                     | 360.0 (2632.6)                              | 493.6 (3272.6)                                | 123.8 (192.8)                                                      |
| Patient share                                                                                  | 34.8 (50.0)                                 | 44.9 (58.5)                                   | 14.6 (18.6)                                                        |
| Net cost <sup>a</sup>                                                                          | 322.7 (2625.7)                              | 444.4 (3263.5)                                | 109.3 (178.6)                                                      |
| <b>Mean (SD) healthcare resource costs (USD) for General Practice/Family Medicine, overall</b> |                                             |                                               |                                                                    |
| Gross Cost                                                                                     | 395.5 (2472.1)                              | 549.5 (3086.6)                                | 140.8 (266.8)                                                      |
| Patient share                                                                                  | 37.5 (80.1)                                 | 48.7 (96.0)                                   | 16.6 (32.8)                                                        |
| Net cost <sup>a</sup>                                                                          | 359.0 (2405.1)                              | 501.7 (3005.2)                                | 126.7 (250.2)                                                      |
| <b>Mean (SD) healthcare resource costs (USD) for dermatology (by activity types), overall</b>  |                                             |                                               |                                                                    |
| Drugs                                                                                          | 188.9 (1150.7)                              | 248.3 (1428.7)                                | 81.9 (237.7)                                                       |
| CPT <sup>b</sup>                                                                               | 215.6 (460.9)                               | 307.69 (701.1)                                | 167.73 (250.5)                                                     |
| HCPCS <sup>c</sup>                                                                             | 29.4 (76.7)                                 | 41.9 (92.5)                                   | 39.2 (112.1)                                                       |
| Services <sup>d</sup>                                                                          | 150.0 (337.6)                               | 190.33 (400.8)                                | 68.34 (71.3)                                                       |
| Unknown <sup>e</sup>                                                                           | 272.2 (3211.7)                              | 337.9 (3646.2)                                | 74.6 (131.7)                                                       |
| <b>Mean (SD) healthcare resource costs (USD) for pediatrics (by activity types), overall</b>   |                                             |                                               |                                                                    |
| Drugs                                                                                          | 126.0 (249.9)                               | 164.1 (472.1)                                 | 50.6 (96.3)                                                        |
| CPT <sup>b</sup>                                                                               | 199.8 (497.2)                               | 257.5 (605.8)                                 | 122.8 (205.5)                                                      |

| <b>AD-related HCRU and associated cost (in USD) per member by specialty</b>                                        | <b>Treated AD cohort – Mild-to-Moderate</b> | <b>Treated AD cohort - Moderate-to-Severe</b> | <b>Untreated or on Drugs not included in the treated AD cohort</b> |
|--------------------------------------------------------------------------------------------------------------------|---------------------------------------------|-----------------------------------------------|--------------------------------------------------------------------|
| HCPCS <sup>c</sup>                                                                                                 | 890.6 (3379.7)                              | 1203.5 (3947.9)                               | 101.2 (274.4)                                                      |
| Services <sup>d</sup>                                                                                              | 206.9 (2206.1)                              | 273.9 (2702.7)                                | 74.0 (69.4)                                                        |
| Unknown <sup>e</sup>                                                                                               | 172.6 (752.8)                               | 211.8 (883.3)                                 | 72.9 (107.2)                                                       |
| <b>Mean (SD) healthcare resource costs (USD) for General Practice/Family Medicine (by activity types), overall</b> |                                             |                                               |                                                                    |
| Drugs                                                                                                              | 199.3 (1100.6)                              | 256.5 (1357.6)                                | 88.7 (251.5)                                                       |
| CPT <sup>b</sup>                                                                                                   | 208.3 (529.8)                               | 290.2 (753.1)                                 | 133.6 (191.4)                                                      |
| HCPCS <sup>c</sup>                                                                                                 | 743.3 (2758.8)                              | 1105.7 (3353.8)                               | 98.5 (239.3)                                                       |
| Services <sup>d</sup>                                                                                              | 169.3(1729.8)                               | 224.0 (2130.1)                                | 63.1 (68.0)                                                        |
| Unknown <sup>e</sup>                                                                                               | 250.5 (2899.3)                              | 320.7 (3384.8)                                | 56.6 (102.1)                                                       |

Abbreviations: AD: atopic dermatitis; ; CPT: current procedural terminology; HCPCS: healthcare common procedure coding system; HCRU: healthcare resource utilization; SD: standard deviation; USD: United States Dollar

<sup>a</sup> The net charge billed by the provider to the payor for the activity.

<sup>b</sup> Procedures - medical, surgical, and diagnostic services.

<sup>c</sup> Supplies and Consumables.

<sup>d</sup> Services: Consultations etc.

<sup>e</sup> Unknown: The discrepant value present in the sum of net cost by activities and total net cost as per e-claims database
